# Supplementary material for: Prediction of survival and recurrence in patients with pancreatic cancer by integrating multi-omics data
Source: PubMed Central journal article supplement (PMC7609582; doi:10.1038/s41598-020-76025-1), 2020-11-03
Supplement: 41598_2020_76025_MOESM1_ESM.pdf [file 41598_2020_76025_MOESM1_ESM.pdf]

# Supplementary Material

## **Prediction of survival and recurrence in patients with pancreatic cancer by integrating multi-omics data**

Bin Baek<sup>1</sup>, Hyunju Lee<sup>1,2\*</sup>

<sup>1</sup> Gwangju Institute of Science and Technology, School of Electrical Engineering and Computer Science, Gwangju, 61005, Korea

<sup>2</sup> Gwangju Institute of Science and Technology, Artificial Intelligence Graduate School, Gwangju, 61005, Korea

[\\*hyunjulee@gist.ac.kr](mailto:hyunjulee@gist.ac.kr)

Figure S1: Kaplan-Meier OS and DFS curves between the two groups with mutations in one of the five genes (KRAS, TP53, CDKN2A, KCNJ18, and HYDIN) or more in TCGA-PAAD dataset.

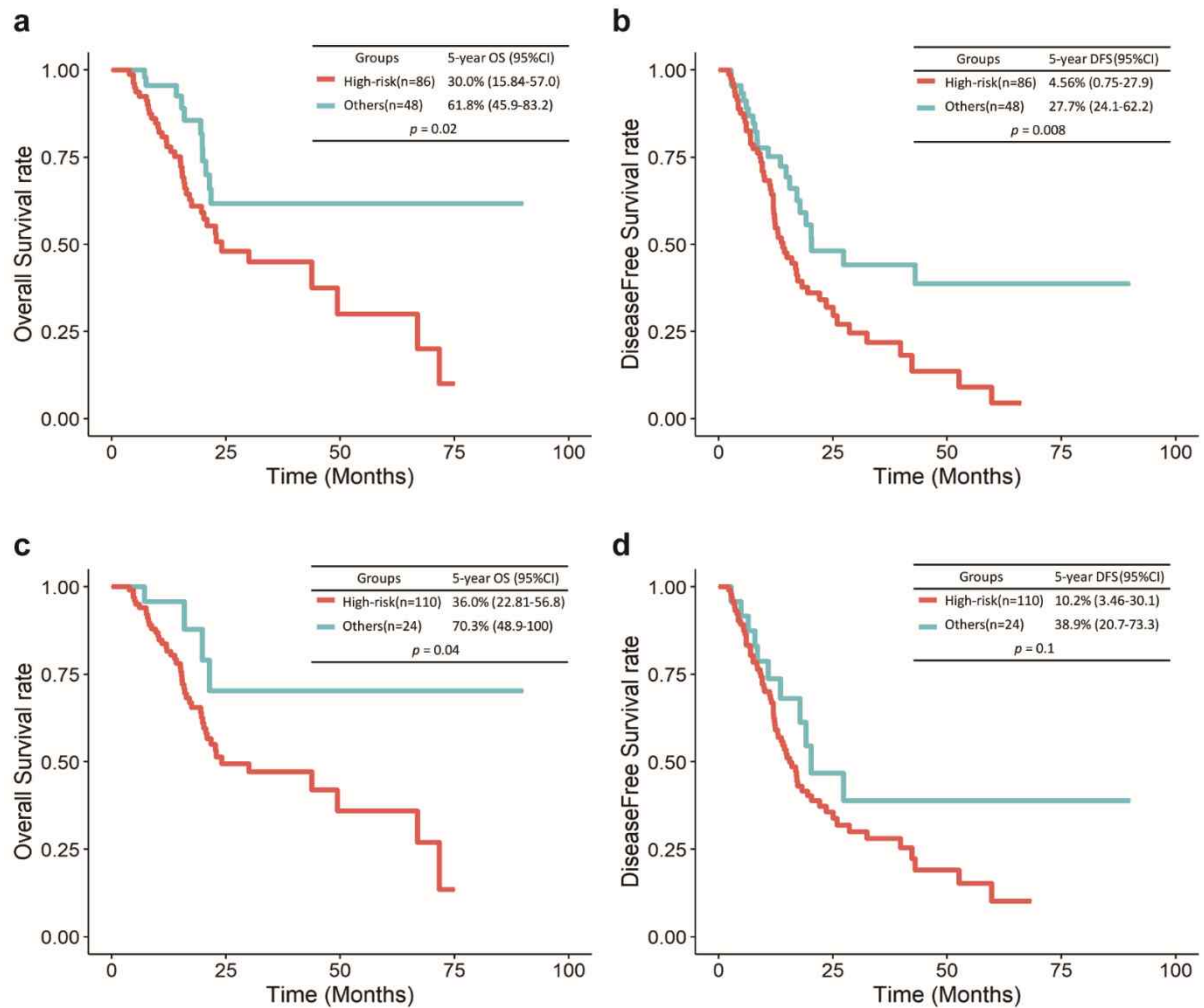

Figure S2: Kaplan-Meier OS and DFS curves between the two groups with mutations in one of the three genes (CDKN2A, TTN, KCNJ18) or more in TCGA-PAAD and PACA-AU-ICGC dataset.

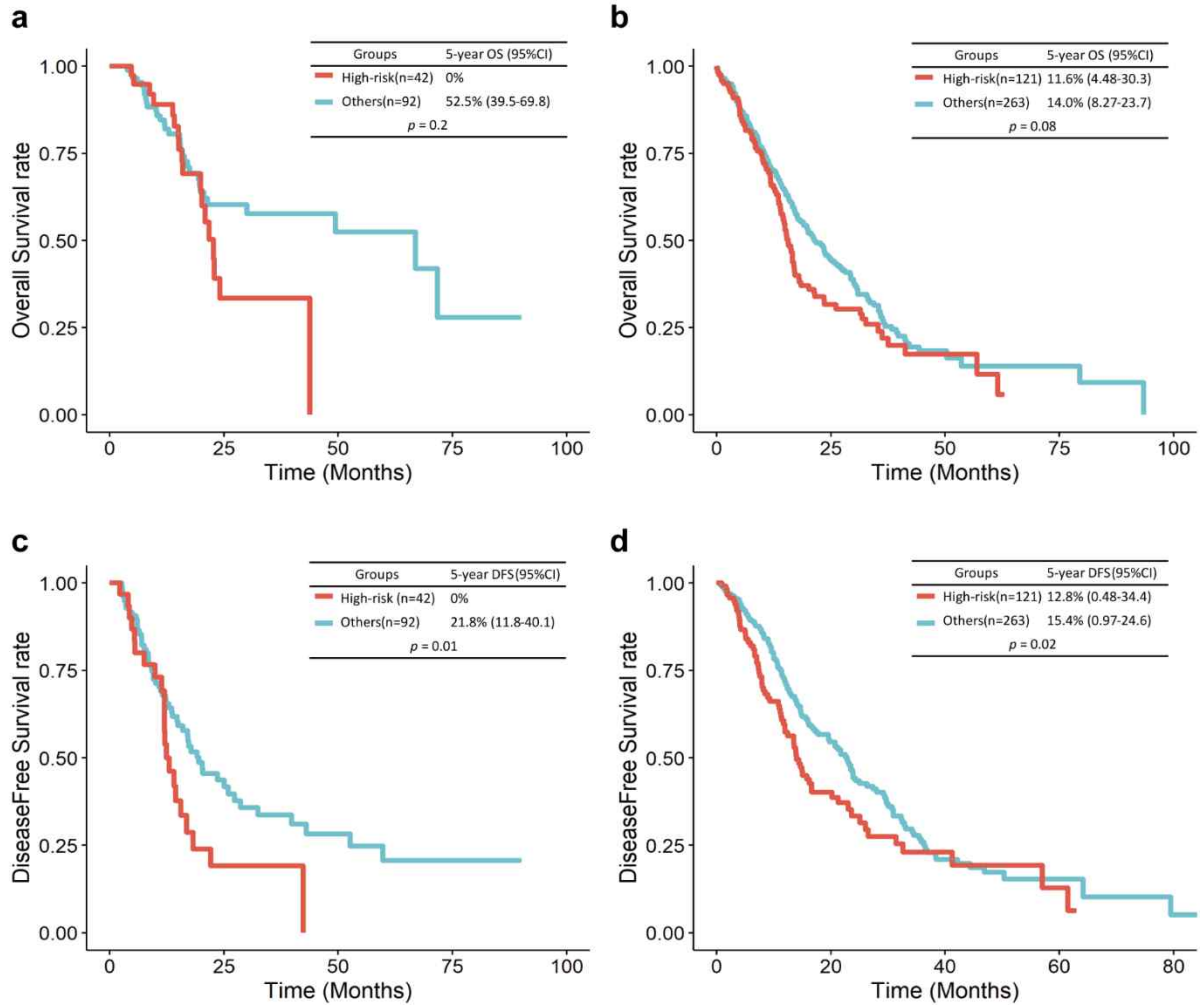

Figure S3: Kaplan-Meier OS and DFS curves between the two groups with mutations in one of the two genes (TTN, KCNJ18) or more in TCGA-PAAD and PACA-AU-ICGC dataset.

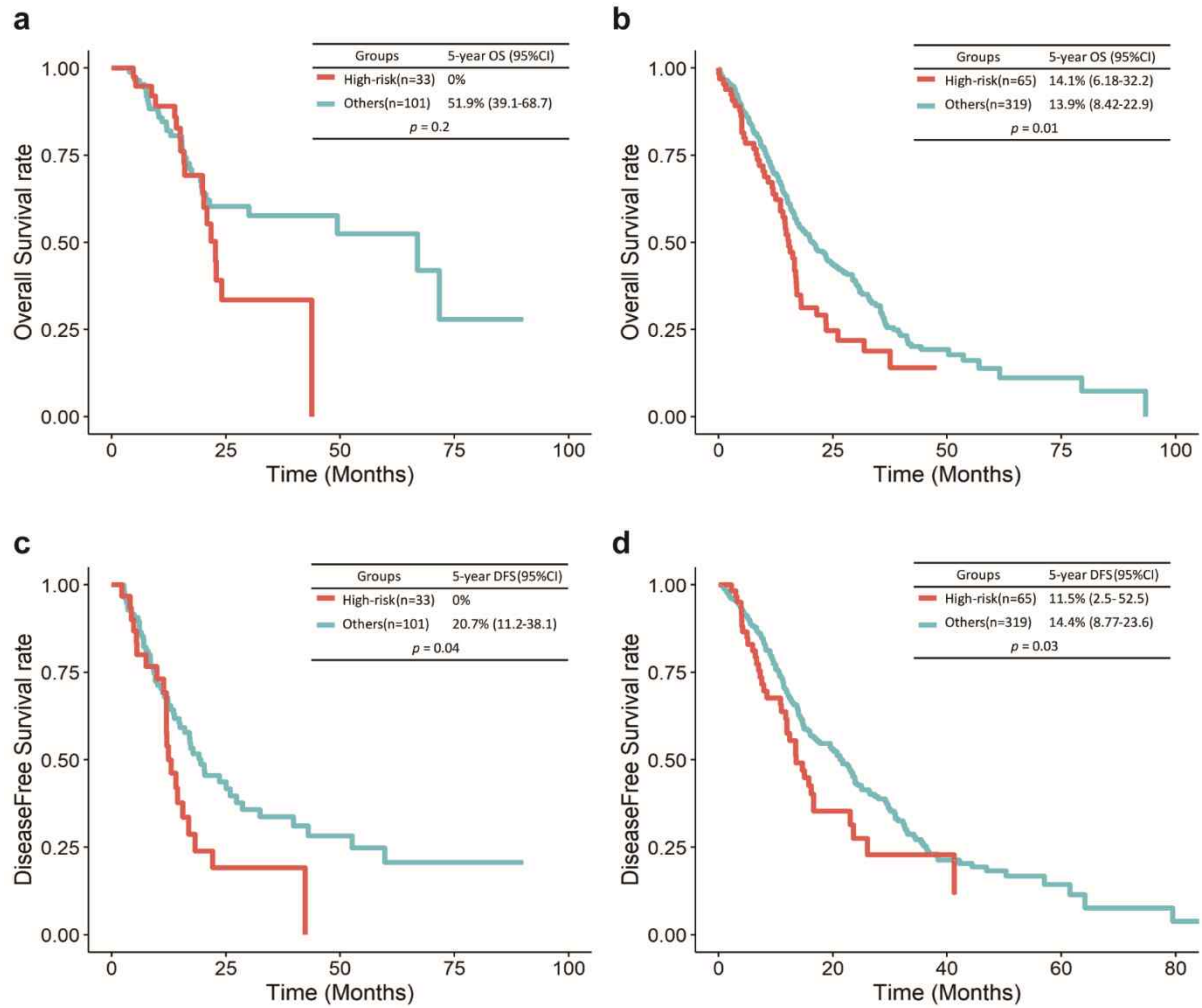



Table S1: List of the 108 genes with CP values

| Gene      | # Mutation | # Sample | Mean_CP  |
|-----------|------------|----------|----------|
| CDKN2A    | 17         | 15       | 0.722009 |
| TP53      | 56         | 55       | 0.666956 |
| TTN       | 20         | 19       | 0.661295 |
| KCNJ18    | 30         | 19       | 0.656332 |
| KRAS      | 68         | 65       | 0.654537 |
| HYDIN     | 10         | 10       | 0.650837 |
| HLA-C     | 16         | 10       | 0.646462 |
| HLA-DRB1  | 51         | 27       | 0.645534 |
| MUC5AC    | 25         | 17       | 0.639289 |
| CES1      | 20         | 8        | 0.628978 |
| HLA-DQB1  | 33         | 9        | 0.624154 |
| EIF4EBP1  | 29         | 8        | 0.612432 |
| KRTAP10-2 | 14         | 9        | 0.606361 |
| MUC20     | 10         | 8        | 0.598033 |
| CDRT1     | 8          | 8        | 0.592816 |
| FLG       | 12         | 8        | 0.590854 |
| POTEF     | 9          | 9        | 0.586723 |
| PRSS1     | 48         | 23       | 0.585673 |
| SMAD4     | 14         | 13       | 0.585333 |
| HS6ST1    | 9          | 9        | 0.582984 |
| FCGBP     | 19         | 18       | 0.577437 |
| TAS2R46   | 36         | 20       | 0.561651 |
| AGAP9     | 11         | 10       | 0.560375 |
| AGAP4     | 11         | 9        | 0.559187 |
| FMN2      | 27         | 17       | 0.558578 |
| LCE1E     | 10         | 10       | 0.557022 |
| OR2T8     | 16         | 13       | 0.550966 |
| MUC3A     | 251        | 102      | 0.550861 |
| RGPD3     | 16         | 16       | 0.548322 |
| MST1L     | 18         | 16       | 0.547167 |
| NPIP11    | 8          | 8        | 0.543527 |
| ADAMTS7   | 19         | 12       | 0.542399 |
| OR2T33    | 13         | 13       | 0.542337 |
| C17orf97  | 12         | 11       | 0.539022 |
| LILRA1    | 46         | 24       | 0.53575  |
| HLA-DRB5  | 48         | 27       | 0.528119 |
| PRSS3     | 120        | 42       | 0.522026 |

Table S1(Continued)

| <b>Gene</b>      | <b># Mut</b> | <b># Sample</b> | <b>Mean_CP</b> |
|------------------|--------------|-----------------|----------------|
| <b>CYP2D6</b>    | 13           | 9               | 0.520032       |
| <b>KCNJ12</b>    | 57           | 32              | 0.518968       |
| <b>GOLGA6L10</b> | 11           | 9               | 0.515922       |
| <b>MUC5B</b>     | 18           | 16              | 0.511324       |
| <b>LRP1B</b>     | 8            | 8               | 0.510439       |
| <b>TAS2R43</b>   | 35           | 20              | 0.509516       |
| <b>MUC16</b>     | 26           | 9               | 0.506691       |
| <b>KRT8</b>      | 10           | 8               | 0.503223       |
| <b>OR11H12</b>   | 12           | 9               | 0.502831       |
| <b>KRTAP5-4</b>  | 11           | 11              | 0.498157       |
| <b>TAS2R31</b>   | 30           | 14              | 0.497081       |
| <b>KRTAP4-8</b>  | 17           | 13              | 0.49313        |
| <b>PRSS2</b>     | 47           | 25              | 0.487695       |
| <b>MYO5B</b>     | 27           | 11              | 0.480788       |
| <b>KIR2DL4</b>   | 23           | 11              | 0.47686        |
| <b>TAS2R19</b>   | 58           | 22              | 0.474835       |
| <b>TPTE2</b>     | 12           | 8               | 0.473647       |
| <b>SLC9B1</b>    | 15           | 14              | 0.472504       |
| <b>HRNR</b>      | 25           | 18              | 0.470865       |
| <b>HLA-B</b>     | 37           | 19              | 0.468114       |
| <b>KRTAP4-11</b> | 19           | 17              | 0.467501       |
| <b>SLC25A5</b>   | 88           | 31              | 0.465818       |
| <b>PABPC3</b>    | 98           | 35              | 0.463753       |
| <b>PRB2</b>      | 12           | 10              | 0.461243       |
| <b>FAM136A</b>   | 19           | 8               | 0.456388       |
| <b>POTEE</b>     | 10           | 8               | 0.455615       |
| <b>PABPC1</b>    | 35           | 16              | 0.450201       |
| <b>WASHC2C</b>   | 13           | 10              | 0.449258       |
| <b>KIR3DL1</b>   | 10           | 8               | 0.444453       |
| <b>PAK2</b>      | 24           | 16              | 0.443356       |
| <b>CRIPAK</b>    | 11           | 10              | 0.441638       |
| <b>PRAMEF15</b>  | 10           | 8               | 0.440937       |
| <b>ESRRA</b>     | 49           | 19              | 0.439359       |
| <b>MUC6</b>      | 74           | 38              | 0.43788        |
| <b>HLA-DQA2</b>  | 39           | 27              | 0.4377         |
| <b>HERC2</b>     | 11           | 10              | 0.434178       |

Table S1(Continued)

| <b>Gene</b>      | <b># Mut</b> | <b># Sample</b> | <b>Mean_CP</b> |
|------------------|--------------|-----------------|----------------|
| <b>TMEM14B</b>   | 9            | 8               | 0.431865       |
| <b>AHNAK2</b>    | 22           | 18              | 0.429024       |
| <b>MTCH2</b>     | 18           | 11              | 0.428475       |
| <b>KRTAP5-10</b> | 8            | 8               | 0.426654       |
| <b>LILRB2</b>    | 20           | 10              | 0.42348        |
| <b>AK2</b>       | 41           | 15              | 0.416627       |
| <b>SLC35G5</b>   | 23           | 16              | 0.415274       |
| <b>PLIN4</b>     | 16           | 13              | 0.41093        |
| <b>LILRB1</b>    | 24           | 17              | 0.40993        |
| <b>NDUFV2</b>    | 12           | 8               | 0.407734       |
| <b>TAS2R30</b>   | 40           | 15              | 0.407581       |
| <b>HLA-A</b>     | 31           | 16              | 0.407174       |
| <b>MAGEC1</b>    | 18           | 17              | 0.404557       |
| <b>HSPD1</b>     | 10           | 8               | 0.398995       |
| <b>GBP4</b>      | 17           | 9               | 0.398516       |
| <b>NASP</b>      | 10           | 10              | 0.396249       |
| <b>LILRA2</b>    | 10           | 9               | 0.380205       |
| <b>RANBP2</b>    | 10           | 10              | 0.379179       |
| <b>KIR3DL2</b>   | 19           | 10              | 0.378035       |
| <b>IRS1</b>      | 15           | 11              | 0.377354       |
| <b>PRB1</b>      | 9            | 8               | 0.375501       |
| <b>ZNF208</b>    | 15           | 13              | 0.371259       |
| <b>PARP4</b>     | 20           | 12              | 0.370569       |
| <b>KMT2C</b>     | 9            | 9               | 0.361993       |
| <b>BAGE3</b>     | 11           | 10              | 0.358582       |
| <b>RBMXL1</b>    | 28           | 12              | 0.356998       |
| <b>OR8U1</b>     | 20           | 14              | 0.352719       |
| <b>SLC35G6</b>   | 12           | 10              | 0.349981       |
| <b>PCDHB4</b>    | 13           | 11              | 0.346215       |
| <b>RBMX</b>      | 21           | 11              | 0.344243       |
| <b>MUC21</b>     | 57           | 17              | 0.343872       |
| <b>UBXN11</b>    | 12           | 9               | 0.340893       |
| <b>FAM8A1</b>    | 23           | 8               | 0.335493       |
| <b>PCDHGA3</b>   | 9            | 8               | 0.324649       |
| <b>NUP50</b>     | 8            | 8               | 0.313037       |



Table S2: List of the frequently mutated genes

| <b>Gene</b>      | <b># Mut</b> | <b># Sample</b> | <b>Frequency</b> |
|------------------|--------------|-----------------|------------------|
| <b>MUC3A</b>     | 251          | 102             | 0.76             |
| <b>KRAS</b>      | 68           | 65              | 0.49             |
| <b>TP53</b>      | 56           | 55              | 0.41             |
| <b>PRSS3</b>     | 120          | 42              | 0.31             |
| <b>MUC6</b>      | 74           | 38              | 0.28             |
| <b>PABPC3</b>    | 98           | 35              | 0.26             |
| <b>KCNJ12</b>    | 57           | 32              | 0.24             |
| <b>SLC25A5</b>   | 88           | 31              | 0.23             |
| <b>HLA-DRB1</b>  | 51           | 27              | 0.20             |
| <b>HLA-DRB5</b>  | 48           | 27              | 0.20             |
| <b>HLA-DQA2</b>  | 39           | 27              | 0.20             |
| <b>PRSS2</b>     | 47           | 25              | 0.19             |
| <b>LILRA1</b>    | 46           | 24              | 0.18             |
| <b>PRSS1</b>     | 48           | 23              | 0.17             |
| <b>TAS2R19</b>   | 58           | 22              | 0.16             |
| <b>TAS2R46</b>   | 36           | 20              | 0.15             |
| <b>TAS2R43</b>   | 35           | 20              | 0.15             |
| <b>TTN</b>       | 20           | 19              | 0.14             |
| <b>KCNJ18</b>    | 30           | 19              | 0.14             |
| <b>HLA-B</b>     | 37           | 19              | 0.14             |
| <b>ESRRA</b>     | 49           | 19              | 0.14             |
| <b>FCGBP</b>     | 19           | 18              | 0.13             |
| <b>HRNR</b>      | 25           | 18              | 0.13             |
| <b>AHNAK2</b>    | 22           | 18              | 0.13             |
| <b>MUC5AC</b>    | 25           | 17              | 0.13             |
| <b>FMN2</b>      | 27           | 17              | 0.13             |
| <b>KRTAP4-11</b> | 19           | 17              | 0.13             |
| <b>LILRB1</b>    | 24           | 17              | 0.13             |
| <b>MAGEC1</b>    | 18           | 17              | 0.13             |
| <b>MUC21</b>     | 57           | 17              | 0.13             |
| <b>RGPD3</b>     | 16           | 16              | 0.12             |
| <b>MST1L</b>     | 18           | 16              | 0.12             |
| <b>MUC5B</b>     | 18           | 16              | 0.12             |
| <b>PABPC1</b>    | 35           | 16              | 0.12             |
| <b>PAK2</b>      | 24           | 16              | 0.12             |
| <b>SLC35G5</b>   | 23           | 16              | 0.12             |
| <b>HLA-A</b>     | 31           | 16              | 0.12             |

Table S2(Continued)

| <b>Gene</b>     | <b># Mut</b> | <b># Sample</b> | <b>Frequency</b> |
|-----------------|--------------|-----------------|------------------|
| <b>CDKN2A</b>   | 17           | 15              | 0.11             |
| <b>AK2</b>      | 41           | 15              | 0.11             |
| <b>TAS2R30</b>  | 40           | 15              | 0.11             |
| <b>TAS2R31</b>  | 30           | 14              | 0.10             |
| <b>SLC9B1</b>   | 15           | 14              | 0.10             |
| <b>OR8U1</b>    | 20           | 14              | 0.10             |
| <b>SMAD4</b>    | 14           | 13              | 0.10             |
| <b>OR2T8</b>    | 16           | 13              | 0.10             |
| <b>OR2T33</b>   | 13           | 13              | 0.10             |
| <b>KRTAP4-8</b> | 17           | 13              | 0.10             |
| <b>PLIN4</b>    | 16           | 13              | 0.10             |
| <b>ZNF208</b>   | 15           | 13              | 0.10             |
| <b>ADAMTS7</b>  | 19           | 12              | 0.09             |
| <b>PARP4</b>    | 20           | 12              | 0.09             |
| <b>RBMXL1</b>   | 28           | 12              | 0.09             |
| <b>C17orf97</b> | 12           | 11              | 0.08             |
| <b>KRTAP5-4</b> | 11           | 11              | 0.08             |
| <b>MYO5B</b>    | 27           | 11              | 0.08             |
| <b>KIR2DL4</b>  | 23           | 11              | 0.08             |
| <b>MTCH2</b>    | 18           | 11              | 0.08             |
| <b>IRS1</b>     | 15           | 11              | 0.08             |
| <b>PCDHB4</b>   | 13           | 11              | 0.08             |
| <b>RBMX</b>     | 21           | 11              | 0.08             |
| <b>HYDIN</b>    | 10           | 10              | 0.07             |
| <b>HLA-C</b>    | 16           | 10              | 0.07             |
| <b>AGAP9</b>    | 11           | 10              | 0.07             |
| <b>LCE1E</b>    | 10           | 10              | 0.07             |
| <b>PRB2</b>     | 12           | 10              | 0.07             |
| <b>WASHC2C</b>  | 13           | 10              | 0.07             |
| <b>CRIPAK</b>   | 11           | 10              | 0.07             |
| <b>HERC2</b>    | 11           | 10              | 0.07             |
| <b>LILRB2</b>   | 20           | 10              | 0.07             |
| <b>NASP</b>     | 10           | 10              | 0.07             |
| <b>RANBP2</b>   | 10           | 10              | 0.07             |
| <b>KIR3DL2</b>  | 19           | 10              | 0.07             |
| <b>BAGE3</b>    | 11           | 10              | 0.07             |
| <b>SLC35G6</b>  | 12           | 10              | 0.07             |

Table S2(Continued)

| <b>Gene</b> | <b># Mut</b> | <b># Sample</b> | <b>Frequency</b> |
|-------------|--------------|-----------------|------------------|
| HLA-DQB1    | 33           | 9               | 0.07             |
| KRTAP10-2   | 14           | 9               | 0.07             |
| POTEF       | 9            | 9               | 0.07             |
| HS6ST1      | 9            | 9               | 0.07             |
| AGAP4       | 11           | 9               | 0.07             |
| CYP2D6      | 13           | 9               | 0.07             |
| GOLGA6L10   | 11           | 9               | 0.07             |
| MUC16       | 26           | 9               | 0.07             |
| OR11H12     | 12           | 9               | 0.07             |
| GBP4        | 17           | 9               | 0.07             |
| LILRA2      | 10           | 9               | 0.07             |
| KMT2C       | 9            | 9               | 0.07             |
| UBXN11      | 12           | 9               | 0.07             |
| CES1        | 20           | 8               | 0.06             |
| EIF4EBP1    | 29           | 8               | 0.06             |
| MUC20       | 10           | 8               | 0.06             |
| CDRT1       | 8            | 8               | 0.06             |
| FLG         | 12           | 8               | 0.06             |
| NPIP11      | 8            | 8               | 0.06             |
| LRP1B       | 8            | 8               | 0.06             |
| KRT8        | 10           | 8               | 0.06             |
| TPTE2       | 12           | 8               | 0.06             |
| FAM136A     | 19           | 8               | 0.06             |
| POTEE       | 10           | 8               | 0.06             |
| KIR3DL1     | 10           | 8               | 0.06             |
| PRAMEF15    | 10           | 8               | 0.06             |
| TMEM14B     | 9            | 8               | 0.06             |
| KRTAP5-10   | 8            | 8               | 0.06             |
| NDUFV2      | 12           | 8               | 0.06             |
| HSPD1       | 10           | 8               | 0.06             |
| PRB1        | 9            | 8               | 0.06             |
| FAM8A1      | 23           | 8               | 0.06             |
| PCDHGA3     | 9            | 8               | 0.06             |
| NUP50       | 8            | 8               | 0.06             |

Table S3: Result of a stepwise logistic regression for selecting clinical features

| STEP                                            | DF | DEVIANCE | RESID. DF | RESID. DEV | AIC      |
|-------------------------------------------------|----|----------|-----------|------------|----------|
| All 14 features                                 |    |          | 98        | 88.67718   | 162.6772 |
| - ICD10 classification                          | 4  | 1.41E+00 | 102       | 90.08247   | 156.0825 |
| - AJCC Metastasis Stage Code                    | 2  | 3.95E+00 | 104       | 94.0362    | 152.0362 |
| - Prior Cancer Diagnosis Occurrence             | 1  | 6.21E-01 | 105       | 94.65696   | 148.657  |
| - Person Neoplasm Status                        | 1  | 5.27E-05 | 106       | 94.65701   | 146.657  |
| - Chronic Pancreatitis Personal Medical History | 1  | 8.76E-02 | 107       | 94.74523   | 142.7452 |
| - Primary Lymph Node Presentation Assessment    | 1  | 3.85E-01 | 108       | 95.13052   | 139.1305 |
| - Race Category                                 | 1  | 1.98E+00 | 109       | 97.1116    | 137.1116 |

AIC (Akaike Information Criterion) evaluates the relative quality of the model for a given data set and is measured by  $AIC = -2\ln(L) + 2k$ , where  $L$  is the likelihood function and  $k$  is the number of parameters in the model. The lower the AIC value, the better the model. When all 14 features were added to the null model ( $\beta_{1,\dots} = 0$ ), the residual deviance decreased as 88.67718 compared to the deviance of null hypothesis and the AIC at that time was 162.6772. The deviation of the ICD 10 classifications was 1.41, and when using only 13 features after excluding the ICD 10 classification, the residual deviance was reduced by 90.08247, making it a better model. When the same procedure was repeated, the seven features in the table were removed.

Table S4: Overall survival (OS) and disease free survival (DFS) using different numbers of the top genes with high CP values

| <b>Genes</b> | <b>OS<br/>p-values</b> | <b>Samples<br/>(0/1)</b> | <b>Observed<br/>(0/1)</b> | <b>DFS<br/>p-values</b> | <b>Samples<br/>(0/1)</b> | <b>Observed<br/>(0/1)</b> |
|--------------|------------------------|--------------------------|---------------------------|-------------------------|--------------------------|---------------------------|
| 3            | 0.002                  | 72/62                    | 20/30                     | 0.00051                 | 72/62                    | 35/43                     |
| 5            | 0.0044                 | 46/88                    | 9/41                      | 0.0014                  | 46/88                    | 19/59                     |
| 7            | 0.008                  | 40/94                    | 8/42                      | 0.0037                  | 40/94                    | 17/61                     |
| 10           | 0.04                   | 24/110                   | 4/46                      | 0.1                     | 24/110                   | 11/67                     |
| 20           | 0.6                    | 13/121                   | 2/48                      | 0.6                     | 13/121                   | 7/71                      |
| 50           | 0.7                    | 2/132                    | 1/49                      | 0.7                     | 2/132                    | 1/77                      |
| 100          | 0.7                    | 2/132                    | 1/49                      | 0.7                     | 2/132                    | 1/77                      |

Table S5: Performance of prediction models depending on the representation of genes with mutations (binary or one-hot vector), different numbers of top genes, and filtering of mRNAs and microRNAs with low variances.

|                              | <b>Without variance cut (dim=19400)</b> |                |               |               | <b>0.01 variance cut (dim=19243)</b> |                |               |               | <b>0.02 variance cut (dim=19005)</b> |                |               |               |
|------------------------------|-----------------------------------------|----------------|---------------|---------------|--------------------------------------|----------------|---------------|---------------|--------------------------------------|----------------|---------------|---------------|
|                              | <b>DFS_acc</b>                          | <b>DFS_Auc</b> | <b>OS_acc</b> | <b>OS_AUC</b> | <b>DFS_acc</b>                       | <b>DFS_Auc</b> | <b>OS_acc</b> | <b>OS_AUC</b> | <b>DFS_acc</b>                       | <b>DFS_Auc</b> | <b>OS_acc</b> | <b>OS_AUC</b> |
| <b>Top 5 genes (binary)</b>  | <b>0.762</b>                            | <b>0.795</b>   | <b>0.769</b>  | <b>0.776</b>  | 0.739                                | 0.741          | 0.746         | 0.749         | 0.731                                | 0.767          | 0.761         | 0.744         |
| <b>Top 3 genes (binary)</b>  | 0.754                                   | 0.784          | 0.754         | 0.760         | 0.739                                | 0.772          | 0.739         | 0.735         | 0.739                                | 0.756          | 0.739         | 0.743         |
| <b>Top 7 genes (binary)</b>  | 0.761                                   | 0.780          | 0.739         | 0.738         | 0.746                                | 0.758          | 0.738         | 0.743         | 0.739                                | 0.760          | 0.724         | 0.750         |
| <b>Top 5 genes (one-hot)</b> | 0.746                                   | 0.752          | 0.724         | 0.738         | 0.739                                | 0.722          | 0.709         | 0.737         | 0.731                                | 0.742          | 0.739         | 0.727         |
| <b>Top 7 genes (one-hot)</b> | 0.746                                   | 0.779          | 0.731         | 0.740         | 0.731                                | 0.726          | 0.724         | 0.767         | 0.724                                | 0.738          | 0.709         | 0.725         |

Table S6: GO pathway analysis for DEGs of subtype G1 using DAVID.

| Category      | Term                                     | Count | %        | P-value  | Genes                                                                                                                                                                                                                                                                                                                                        |
|---------------|------------------------------------------|-------|----------|----------|----------------------------------------------------------------------------------------------------------------------------------------------------------------------------------------------------------------------------------------------------------------------------------------------------------------------------------------------|
| GOTERM_BP_FAT | GO:0000279~M phase                       | 41    | 5.718271 | 5.17E-10 | KIF23, PRC1, NEK2, TTK, CHEK1, ANLN, AURKA, CEP55, PTTG1, SPC24, FAM83D, SPC25, RSPH1, OIP5, OVOL1, SKA3, CDCA5, ASPM, TRIP13, EXO1, CDK1, CDC6, MKI67, DLGAP5, TPX2, KIF18A, NUF2, CENPF, CDC20, BIRC5, PBK, HMGA2, CDC25C, UBE2C, TACC2, CCNB1, CCNB2, EREG, PLK1, ZWINT, CKS2                                                             |
| GOTERM_BP_FAT | GO:0022403~cell cycle phase              | 45    | 6.276151 | 4.97E-09 | E2F1, KIF23, PRC1, NEK2, TTK, CHEK1, ANLN, AURKA, PTTG1, CEP55, SPC24, FAM83D, SPC25, RSPH1, OIP5, OVOL1, SKA3, CDCA5, ASPM, TRIP13, EXO1, CDK1, CDC6, MKI67, DLGAP5, TPX2, NUF2, KIF18A, CENPF, CDC20, BIRC5, PBK, HMGA2, CDKN3, CDC25C, UBE2C, TACC2, CCNB1, CCND1, CCNB2, EREG, PLK1, ZWINT, CKS2, USH1C                                  |
| GOTERM_BP_FAT | GO:0007586~digestion                     | 19    | 2.64993  | 2.08E-08 | MOGAT2, SLC5A1, CAPN9, UGT1A1, MUC6, ABCG8, KCNN4, UGT1A10, UGT1A8, SSTR1, AKR1B10, PRSS3, CTSE, TFF2, TFF3, FABP1, MUC5AC, FABP2, TFF1, PYY, NMU                                                                                                                                                                                            |
| GOTERM_BP_FAT | GO:0007067~mitosis                       | 30    | 4.1841   | 2.17E-08 | KIF23, NEK2, AURKA, ANLN, CEP55, PTTG1, SPC24, FAM83D, SPC25, OIP5, SKA3, CDCA5, ASPM, CDC6, CDK1, DLGAP5, TPX2, KIF18A, NUF2, CENPF, BIRC5, CDC20, PBK, HMGA2, UBE2C, CDC25C, CCNB1, CCNB2, PLK1, ZWINT                                                                                                                                     |
| GOTERM_BP_FAT | GO:0000280~nuclear division              | 30    | 4.1841   | 2.17E-08 | KIF23, NEK2, AURKA, ANLN, CEP55, PTTG1, SPC24, FAM83D, SPC25, OIP5, SKA3, CDCA5, ASPM, CDC6, CDK1, DLGAP5, TPX2, KIF18A, NUF2, CENPF, BIRC5, CDC20, PBK, HMGA2, UBE2C, CDC25C, CCNB1, CCNB2, PLK1, ZWINT                                                                                                                                     |
| GOTERM_BP_FAT | GO:0000087~M phase of mitotic cell cycle | 30    | 4.1841   | 3.26E-08 | KIF23, NEK2, AURKA, ANLN, CEP55, PTTG1, SPC24, FAM83D, SPC25, OIP5, SKA3, CDCA5, ASPM, CDC6, CDK1, DLGAP5, TPX2, KIF18A, NUF2, CENPF, BIRC5, CDC20, PBK, HMGA2, UBE2C, CDC25C, CCNB1, CCNB2, PLK1, ZWINT                                                                                                                                     |
| GOTERM_BP_FAT | GO:0048285~organelle fission             | 30    | 4.1841   | 5.34E-08 | KIF23, NEK2, AURKA, ANLN, CEP55, PTTG1, SPC24, FAM83D, SPC25, OIP5, SKA3, CDCA5, ASPM, CDC6, CDK1, DLGAP5, TPX2, KIF18A, NUF2, CENPF, BIRC5, CDC20, PBK, HMGA2, UBE2C, CDC25C, CCNB1, CCNB2, PLK1, ZWINT                                                                                                                                     |
| GOTERM_BP_FAT | GO:0022402~cell cycle process            | 50    | 6.973501 | 4.30E-07 | KIF23, E2F1, PRC1, NEK2, TTK, ANLN, AURKA, CHEK1, CEP55, PTTG1, SPC24, FAM83D, SPC25, SBDS, OIP5, RSPH1, OVOL1, SKA3, CDCA5, ASPM, TRIP13, EXO1, CDC6, CDK1, MKI67, DLGAP5, TPX2, KIF18A, NUF2, CENPF, CDC20, BIRC5, PBK, HMGA2, RACGAP1, CDKN3, CDC25C, UBE2C, TP73, TACC2, CCNB1, CCND1, CCNB2, EREG, IRF6, PLK1, ZWINT, CKS2, USH1C, ERN2 |
| GOTERM_BP_FAT | GO:0000278~mitotic cell cycle            | 37    | 5.160391 | 1.12E-06 | KIF23, E2F1, PRC1, NEK2, TTK, CHEK1, ANLN, AURKA, CEP55, PTTG1, SPC24, FAM83D, SPC25, OIP5, SKA3, CDCA5, ASPM, CDK1, CDC6, DLGAP5, TPX2, KIF18A, NUF2, CENPF, BIRC5, CDC20, PBK, HMGA2, CDKN3, UBE2C, CDC25C, CCNB1, CCND1, CCNB2, PLK1, ZWINT, USH1C                                                                                        |

Table S6(Continued)

| Category      | Term                                       | Count | %        | PValue   | Genes                                                                                                                                                                                                                                                                                                                                                                                                       |
|---------------|--------------------------------------------|-------|----------|----------|-------------------------------------------------------------------------------------------------------------------------------------------------------------------------------------------------------------------------------------------------------------------------------------------------------------------------------------------------------------------------------------------------------------|
| GOTERM_BP_FAT | GO:0007398~ectoderm development            | 25    | 3.48675  | 1.84E-06 | ZBTB7B, KRT6A, CRABP2, GJB3, KRT13, GJB5, EDAR, SFN, SPINK5, SHH, SCEL, FOXQ1, LAMA3, EVPL, EREG, CASP14, IRF6, KRT16, LHX1, PPL, OVOL1, SPRR3, AHNAK2, LAMC2, IVL                                                                                                                                                                                                                                          |
| GOTERM_BP_FAT | GO:0060429~epithelium development          | 27    | 3.76569  | 1.84E-06 | HOXA11, TFCEP2L1, SFN, SPINK5, SHH, ZIC2, EZR, OVOL2, HOXA5, PPL, AHNAK2, IVL, UPK2, F11R, TBX4, FOXA1, MECOM, SCEL, LAMA3, EVPL, RHCG, EREG, CA9, IRF6, ZIC5, SPRR3, DMBT1                                                                                                                                                                                                                                 |
| GOTERM_BP_FAT | GO:0051301~cell division                   | 31    | 4.32357  | 3.65E-06 | KIF23, CKS1B, PRC1, NEK2, ANLN, CEP55, PTTG1, SPC24, FAM83D, SPC25, OIP5, SKA3, CDCA5, ASPM, CDK1, PARD6B, CDC6, NUF2, CENPF, BIRC5, CDC20, HMGA2, RACGAP1, UBE2C, CDC25C, CCNB1, CCND1, CCNB2, PLK1, ZWINT, CKS2                                                                                                                                                                                           |
| GOTERM_BP_FAT | GO:0007059~chromosome segregation          | 15    | 2.09205  | 4.23E-06 | NEK2, DLGAP5, NUF2, KIF18A, CENPF, BIRC5, PTTG1, SRPK1, SPC25, HJURP, RIOK3, ZWINT, SKA3, CDCA5, TOP2A                                                                                                                                                                                                                                                                                                      |
| GOTERM_BP_FAT | GO:0007049~cell cycle                      | 59    | 8.228731 | 4.68E-06 | E2F1, KIF23, S100A6, PRC1, E2F7, TTK, AURKA, PTTG1, FAM83D, CDC45, SBDS, RSPH1, OIP5, CDCA5, ASPM, CDK1, CDC6, TPX2, PBK, HMGA2, UBE2C, TACC2, CCND1, EREG, ZWINT, MAPK3, USH1C, ERN2, CKS1B, NEK2, LIN9, FOXM1, ANLN, CHEK1, CEP55, SPC24, SPC25, HJURP, OVOL1, SKA3, TRIP13, EXO1, PARD6B, MKI67, DLGAP5, NUF2, KIF18A, CENPF, BIRC5, CDC20, RACGAP1, CDKN3, CDC25C, TP73, CCNB1, CCNB2, PLK1, IRF6, CKS2 |
| GOTERM_BP_FAT | GO:0065004~protein-DNA complex assembly    | 15    | 2.09205  | 1.70E-05 | HIST1H2AC, HIST1H2BC, HIST1H2BD, HIST1H1C, CENPF, HIST2H4A, HIST1H2BK, HIST2H2BE, HJURP, HIST2H2BF, HIST1H2BJ, HIST3H2A, HIST1H4I, ASF1B, HIST3H2BB, HIST1H3H, HIST1H4H                                                                                                                                                                                                                                     |
| GOTERM_BP_FAT | GO:0008544~epidermis development           | 22    | 3.06834  | 1.89E-05 | CRABP2, GJB3, KRT13, GJB5, SFN, EDAR, SPINK5, SHH, SCEL, FOXQ1, LAMA3, EVPL, EREG, IRF6, CASP14, KRT16, PPL, OVOL1, SPRR3, AHNAK2, LAMC2, IVL                                                                                                                                                                                                                                                               |
| GOTERM_BP_FAT | GO:0034728~nucleosome organization         | 15    | 2.09205  | 2.20E-05 | HIST1H2AC, HIST1H2BC, HIST1H2BD, HIST1H1C, HIST2H4A, HMGA1, HIST1H2BK, HIST2H2BE, HJURP, HIST2H2BF, HIST1H2BJ, HIST3H2A, HIST1H4I, ASF1B, HIST3H2BB, HIST1H3H, HIST1H4H                                                                                                                                                                                                                                     |
| GOTERM_BP_FAT | GO:0006334~nucleosome assembly             | 14    | 1.95258  | 3.18E-05 | HIST1H2AC, HIST1H2BC, HIST1H2BD, HIST1H1C, HIST2H4A, HIST1H2BK, HIST2H2BE, HJURP, HIST2H2BF, HIST1H2BJ, HIST3H2A, HIST1H4I, ASF1B, HIST3H2BB, HIST1H3H, HIST1H4H                                                                                                                                                                                                                                            |
| GOTERM_BP_FAT | GO:0030855~epithelial cell differentiation | 18    | 2.51046  | 4.02E-05 | F11R, TFCEP2L1, FOXA1, SFN, SPINK5, SCEL, EZR, LAMA3, EVPL, RHCG, EREG, IRF6, PPL, SPRR3, AHNAK2, IVL, UPK2, DMBT1                                                                                                                                                                                                                                                                                          |
| GOTERM_BP_FAT | GO:0031497~chromatin assembly              | 14    | 1.95258  | 4.65E-05 | HIST1H2AC, HIST1H2BC, HIST1H2BD, HIST1H1C, HIST2H4A, HIST1H2BK, HIST2H2BE, HJURP, HIST2H2BF, HIST1H2BJ, HIST3H2A, HIST1H4I, ASF1B, HIST3H2BB, HIST1H3H, HIST1H4H                                                                                                                                                                                                                                            |
| GOTERM_BP_FAT | GO:0022600~digestive system process        | 9     | 1.25523  | 5.05E-05 | ABCG8, KCNN4, MOGAT2, SLC5A1, FABP1, TFF1, FABP2, MUC6, NMU                                                                                                                                                                                                                                                                                                                                                 |
| GOTERM_BP_FAT | GO:0006323~DNA packaging                   | 16    | 2.23152  | 7.76E-05 | HIST1H2AC, HIST1H2BC, HIST1H2BD, HIST1H1C, HIST2H4A, HIST1H2BK, HIST2H2BE, HJURP, HIST2H2BF, HIST1H2BJ, HIST3H2A, HIST1H4I, ASF1B, HIST3H2BB, CDCA5, TOP2A, HIST1H3H, HIST1H4H                                                                                                                                                                                                                              |



Table S6(Continued)

| Category      | Term                                    | Count | %        | PValue   | Genes                                                                                                                                                                                                                                                                                                                                                                                       |
|---------------|-----------------------------------------|-------|----------|----------|---------------------------------------------------------------------------------------------------------------------------------------------------------------------------------------------------------------------------------------------------------------------------------------------------------------------------------------------------------------------------------------------|
| GOTERM_BP_FAT | GO:0048665~neuron fate specification    | 6     | 0.83682  | 2.33E-04 | HOXC10, EVX1, NKX6-2, FOXA1, HOXD10, SHH                                                                                                                                                                                                                                                                                                                                                    |
| GOTERM_BP_FAT | GO:0007051~spindle organization         | 9     | 1.25523  | 4.04E-04 | KIF23, SPC25, PRC1, ZWINT, CKS2, TTK, AURKA, UBE2C, TACC2                                                                                                                                                                                                                                                                                                                                   |
| GOTERM_CC_FAT | GO:0005911~cell-cell junction           | 26    | 3.62622  | 2.82E-07 | CLDN18, SLC5A1, LMO7, GJC2, CLDN12, PCDH1, MARVELD2, PPL, SLC2A1, F11R, PARD6B, STX3, GJB3, GJB5, EVPL, ITGA6, CGN, DSG3, PKP3, PKP4, CDC42BPA, DSC3, TJP3, PERP, PDZD3, STEAP1                                                                                                                                                                                                             |
| GOTERM_CC_FAT | GO:0005819~spindle                      | 21    | 2.92887  | 2.59E-06 | KIF14, KIF23, CDC6, CDK1, KIF4A, PRC1, NEK2, DLGAP5, TPX2, KIF18A, CENPF, TTK, AURKA, CDC20, BIRC5, RACGAP1, FAM83D, SBDS, PLK1, SKA3, ASPM                                                                                                                                                                                                                                                 |
| GOTERM_CC_FAT | GO:0045177~apical part of cell          | 23    | 3.20781  | 4.59E-06 | MUC1, PARD6B, MYO1A, SLC22A18, STX3, CLCA4, ERBB3, SLC5A1, PRKCI, AQP5, DUOX1, LMO7, EDAR, AMN, ABCG8, EZR, RHCG, USH1C, STK39, FABP1, FABP2, SLC39A4, PDZD3                                                                                                                                                                                                                                |
| GOTERM_CC_FAT | GO:0043296~apical junction complex      | 15    | 2.09205  | 5.32E-05 | F11R, PARD6B, CLDN18, CLDN12, EVPL, CGN, MARVELD2, DSG3, PPL, PKP3, PKP4, DSC3, PERP, TJP3, PDZD3                                                                                                                                                                                                                                                                                           |
| GOTERM_CC_FAT | GO:0000786~nucleosome                   | 12    | 1.67364  | 4.71E-05 | HIST1H2AC, HIST1H2BC, HIST1H2BD, HIST1H1C, HIST1H2BK, HIST2H2BE, HIST2H2BF, HIST1H2BJ, HIST3H2A, HIST3H2BB, HIST2H4A, HIST1H4I, HIST1H3H, HIST1H4H                                                                                                                                                                                                                                          |
| GOTERM_CC_FAT | GO:0016327~apicolateral plasma membrane | 15    | 2.09205  | 7.43E-05 | F11R, PARD6B, CLDN18, CLDN12, EVPL, CGN, MARVELD2, DSG3, PPL, PKP3, PKP4, DSC3, PERP, TJP3, PDZD3                                                                                                                                                                                                                                                                                           |
| GOTERM_CC_FAT | GO:0030057~desmosome                    | 7     | 0.97629  | 1.14E-04 | EVPL, DSG3, PPL, PKP3, PKP4, DSC3, PERP                                                                                                                                                                                                                                                                                                                                                     |
| GOTERM_CC_FAT | GO:0016324~apical plasma membrane       | 16    | 2.23152  | 3.87E-04 | MUC1, MYO1A, SLC22A18, STX3, CLCA4, ERBB3, SLC5A1, PRKCI, AQP5, DUOX1, LMO7, ABCG8, EZR, RHCG, STK39, SLC39A4                                                                                                                                                                                                                                                                               |
| GOTERM_CC_FAT | GO:0032993~protein-DNA complex          | 12    | 1.67364  | 7.95E-04 | HIST1H2AC, HIST1H2BC, HIST1H2BD, HIST1H1C, HIST1H2BK, HIST2H2BE, HIST2H2BF, HIST1H2BJ, HIST3H2A, HIST3H2BB, HIST2H4A, HIST1H4I, HIST1H3H, HIST1H4H                                                                                                                                                                                                                                          |
| GOTERM_CC_FAT | GO:0044427~chromosomal part             | 30    | 4.1841   | 0.00138  | HIST1H2AC, CHEK1, HIST2H4A, SPC24, SPC25, HIST1H2BK, OIP5, HJURP, HIST1H2BJ, SKA3, HIST3H2A, HIST1H4I, ASF1B, HIST3H2BB, CDCA5, HIST1H4H, CENPN, HIST1H2BC, HIST1H2BD, MKI67, HIST1H1C, RCOR2, NUF2, CENPF, BIRC5, HMGA2, HMGA1, CENPI, HIST2H2BE, ZWINT, HIST2H2BF, HIST1H3H                                                                                                               |
| GOTERM_CC_FAT | GO:0030054~cell junction                | 37    | 5.160391 | 0.00155  | CLDN18, SLC5A1, FERMT1, FHL2, LMO7, GJC2, CLDN12, PCDH1, MARVELD2, PPL, SLC2A1, CHRNA5, PARD6B, F11R, ICA1, STX3, CDHR2, GJB3, GJB5, CAMK2N1, TNS4, SDC1, ARHGAP32, LAMA3, EVPL, ITGA6, DSG3, CGN, PKP3, PKP4, DSC3, CDC42BPA, PERP, TJP3, PDZD3, STEAP1, IGSF9                                                                                                                             |
| GOTERM_CC_FAT | GO:0012505~endomembrane system          | 51    | 7.112971 | 0.001314 | CYP3A4, CYP3A5, S100A6, HTATIP2, CLTB, SLC22A18, CYP2C18, CYP2S1, NUP62CL, LEMD1, CYP2W1, SPINK5, SLC35A2, AP1S3, APOB, AP1S1, PTGES, ASPH, ELOVL6, RAB27B, JPH1, STX1A, BCL2L14, DUOX1, TMEM38A, CDHR5, CLIC1, CDS1, ST6GALNAC1, AADAC, ARHGAP32, CHST6, ASPHD2, STEAP2, DOLPP1, AP1M2, MAL2, GIPC1, ECE2, FUT2, GAD1, QSOX1, UPK2, ICA1, CENPF, TMPRSS3, RNF43, CYP4F3, HSPD1, ABO, DMBT1 |

Table S6(Continued)

| List Total | Pop Hits | Pop Total | Fold Enrichment | Bonferroni | Benjamini | FDR      |
|------------|----------|-----------|-----------------|------------|-----------|----------|
| 551        | 329      | 13528     | 3.059637        | 1.25E-06   | 1.25E-06  | 9.09E-07 |
| 551        | 414      | 13528     | 2.668666        | 1.20E-05   | 6.01E-06  | 8.73E-06 |
| 551        | 91       | 13528     | 5.126184        | 5.03E-05   | 1.68E-05  | 3.66E-05 |
| 551        | 220      | 13528     | 3.347962        | 5.25E-05   | 1.31E-05  | 3.82E-05 |
| 551        | 220      | 13528     | 3.347962        | 5.25E-05   | 1.31E-05  | 3.82E-05 |
| 551        | 224      | 13528     | 3.288177        | 7.88E-05   | 1.58E-05  | 5.73E-05 |
| 551        | 229      | 13528     | 3.216383        | 1.29E-04   | 2.15E-05  | 9.38E-05 |
| 551        | 565      | 13528     | 2.172719        | 0.001039   | 1.49E-04  | 7.55E-04 |
| 551        | 370      | 13528     | 2.455172        | 0.002694   | 3.37E-04  | 0.00196  |
| 551        | 199      | 13528     | 3.084387        | 0.00443    | 4.93E-04  | 0.003226 |
| 551        | 227      | 13528     | 2.920249        | 0.004442   | 4.45E-04  | 0.003235 |
| 551        | 295      | 13528     | 2.580012        | 0.008781   | 8.01E-04  | 0.006408 |
| 551        | 81       | 13528     | 4.546616        | 0.010172   | 8.52E-04  | 0.007428 |
| 551        | 776      | 13528     | 1.86669         | 0.011264   | 8.71E-04  | 0.00823  |
| 551        | 91       | 13528     | 4.046987        | 0.040392   | 0.002941  | 0.029951 |
| 551        | 184      | 13528     | 2.935532        | 0.044756   | 0.003048  | 0.033261 |
| 551        | 93       | 13528     | 3.959956        | 0.051745   | 0.003315  | 0.038595 |
| 551        | 84       | 13528     | 4.091954        | 0.074075   | 0.004517  | 0.0559   |
| 551        | 137      | 13528     | 3.225774        | 0.092728   | 0.005392  | 0.070676 |
| 551        | 87       | 13528     | 3.950852        | 0.10647    | 0.005908  | 0.081757 |
| 551        | 34       | 13528     | 6.498986        | 0.114977   | 0.006088  | 0.088701 |
| 551        | 117      | 13528     | 3.357501        | 0.171107   | 0.008897  | 0.136252 |
| 551        | 15       | 13528     | 9.82069         | 0.431288   | 0.025327  | 0.409205 |

Table S6(Continued)

| List Total | Pop Hits | Pop Total | Fold Enrichment | Bonferroni | Benjamini | FDR      |
|------------|----------|-----------|-----------------|------------|-----------|----------|
| 551        | 45       | 13528     | 4.910345        | 0.624114   | 0.04165   | 0.708374 |
| 529        | 190      | 12782     | 3.306457        | 1.01E-04   | 1.01E-04  | 3.87E-04 |
| 529        | 147      | 12782     | 3.451796        | 9.28E-04   | 4.64E-04  | 0.003558 |
| 529        | 179      | 12782     | 3.104688        | 0.001643   | 5.48E-04  | 0.006304 |
| 529        | 99       | 12782     | 3.660996        | 0.01886    | 0.003801  | 0.072958 |
| 529        | 63       | 12782     | 4.602394        | 0.016725   | 0.004208  | 0.06463  |
| 529        | 102      | 12782     | 3.553319        | 0.026246   | 0.004423  | 0.101897 |
| 529        | 20       | 12782     | 8.4569          | 0.04       | 0.005815  | 0.156357 |
| 529        | 133      | 12782     | 2.906775        | 0.129312   | 0.01716   | 0.52938  |
| 529        | 86       | 12782     | 3.371522        | 0.247866   | 0.031153  | 1.085902 |
| 529        | 386      | 12782     | 1.87792         | 0.390156   | 0.043964  | 1.877846 |
| 529        | 518      | 12782     | 1.725898        | 0.426052   | 0.045214  | 2.105753 |
| 529        | 782      | 12782     | 1.57582         | 0.3755     | 0.045989  | 1.788483 |

Table S7: GO pathway analysis for DEGs of subtype G2 using DAVID.

| Category      | Term                                     | Count     | %               | PValue     | Genes              |          |
|---------------|------------------------------------------|-----------|-----------------|------------|--------------------|----------|
| GOTERM_MF_FAT | GO:0004035~alkaline phosphatase activity | 3         | 0.626305        | 1.11E-04   | ALPPL2, ALPI, ALPP |          |
| List Total    | Pop Hits                                 | Pop Total | Fold Enrichment | Bonferroni | Benjamini          | FDR      |
| 37            | 6                                        | 12983     | 175.4459        | 0.018863   | 0.018863           | 0.135901 |
